# Supplementary material
Source: Springer Nature journal article supplement (https://www.springermedizin.de/resource/supplementary/13011_2010_140_MOESM2_ESM.pdf/9628482)

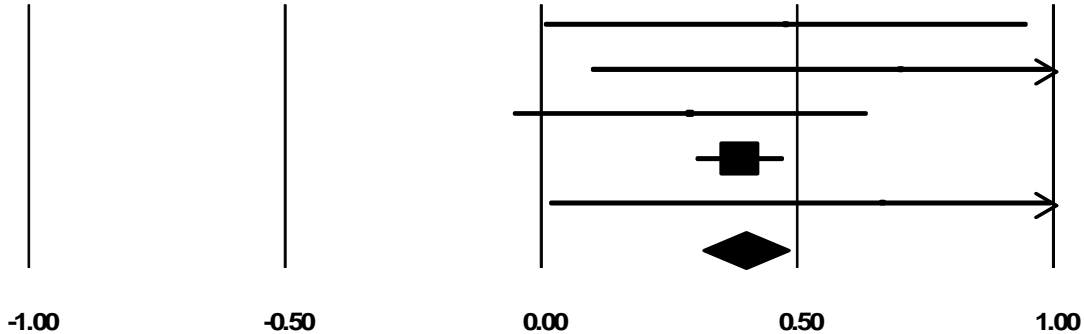

Supplement: MOESM2 [file 9628482]
